# Supplementary material for: Structure-Based Drug Design and Characterization of Sulfonyl-Piperazine Benzothiazinone Inhibitors of DprE1 from Mycobacterium tuberculosis
Source: PubMed Central journal article supplement (PMC6153800; doi:10.1128/aac.00681-18), 2018-09-24
Supplement: zac010187478s1.pdf [file zac010187478s1.pdf]

**SUPPLEMENTAL MATERIALS  
FOR**

**Structure-based drug design and characterization of  
sulfonyl-piperazine benzothiazinone inhibitors of DprE1  
from *Mycobacterium tuberculosis***

**Jérémie Piton<sup>1</sup>, Anthony Vocat<sup>1</sup>, Andréanne Lupien<sup>1</sup>, Caroline Foo<sup>1</sup>, Olga  
Riabova<sup>2</sup>, Vadim Makarov<sup>2</sup>, Stewart T. Cole<sup>1\*</sup>**

<sup>1</sup>Global Health Institute, Ecole Polytechnique Fédérale de Lausanne, Station 19, 1015  
Lausanne, Switzerland

<sup>2</sup>FRC Fundamentals of Biotechnology RAS, Leninsky prospekt 33-2, Moscow,  
119071, Russian Federation

**Synthetic route for 2-[4-(R-sulfonyl)piperazin-1-yl]-8-nitro-6-(trifluoromethyl)-4H-1,3-benzothiazin-4-one derivatives**

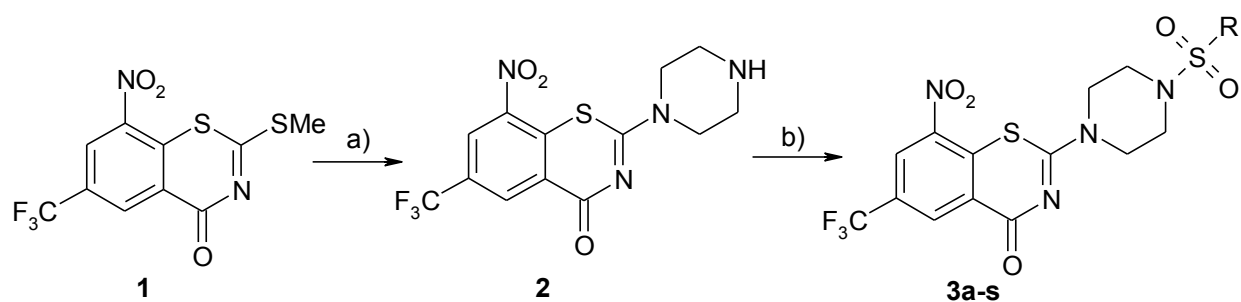

| <b>3</b> | <b>R</b> | <b>3</b> | <b>R</b> |
|----------|----------|----------|----------|
| a        | Me       | k        |          |
| b        | Et       | l        |          |
| c        |          | m        |          |
| d        | n-butyl  | n        |          |
| e        |          | o        |          |
| f        |          | p        |          |
| g        |          | q        |          |
| h        |          | r        |          |
| i        |          | s        |          |
| j        |          |          |          |

**General Procedure for the synthesis of 2-[4-(R-sulfonyl)piperazin-1-yl]-8-nitro-6-(trifluoromethyl)-4H-1,3-benzothiazin-4-one derivatives.**

**Step a).** At 20 °C, finely ground solid 2-(methylthio)-8-nitro-6-(trifluoromethyl)-4H-1,3-benzothiazin-4-one (25 mmol) (Makarov, EMBO Mol Med, 2014) was added in one portion under intensive mixing to solution of piperazine hexahydrate (125 mmol) in 15 ml of ethanol. After 5 min reaction mixture was diluted by water, yellow solid was filtered off and recrystallised from ethyl acetate twice. The yield of 8-nitro-2-piperazin-1-yl-6-(trifluoromethyl)-4H-1,3-benzothiazin-4-one is 74%, mp 151-5 °C. Mass (EI),  $m/z$  ( $I_{relat.}(\%)$ ): 359.3126 [M]<sup>+</sup> (45). C<sub>11</sub>H<sub>13</sub>F<sub>3</sub>N<sub>4</sub>O<sub>3</sub>S. <sup>1</sup>H NMR (DMSO-d<sub>6</sub>): 3.16 (4H, br s, N(CH<sub>2</sub>)<sub>2</sub>), 3.98 (4H, br s, N(CH<sub>2</sub>)<sub>2</sub>), 8.73 (1H, s, CH), 8.87 (1H, s, CH) ppm.

**Step b).** Solution of 8-nitro-2-piperazin-1-yl-6-(trifluoromethyl)-4H-1,3-benzothiazin-4-one (10 mmol) in 5 mL of pyridine was treated by corresponding sulfonyl chloride (10 mmol) at 20 °C. After 1 hour the reaction mixture was diluted by water and acidified by concentrated hydrochloride solution in water till pH 1. Formed solid of 2-[4-(R-sulfonyl)piperazin-1-yl]-8-nitro-6-(trifluoromethyl)-4H-1,3-benzothiazin-4-one was filtered off and washed by water.

*2-[4-(Methylsulfonyl)piperazin-1-yl]-8-nitro-6-(trifluoromethyl)-4H-1,3-benzothiazin-4-one* **3a** (11626095) Yield 61%. Mp. 186-8 °C (EtOH). Mass (EI),  $m/z$  ( $I_{relat.}(\%)$ ): 437.4042 [M]<sup>+</sup> (49). C<sub>14</sub>H<sub>13</sub>F<sub>3</sub>N<sub>4</sub>O<sub>5</sub>S<sub>2</sub>. <sup>1</sup>H NMR (DMSO-d<sub>6</sub>): 2.93 (3H, s, CH<sub>3</sub>), 3.24 (4H, br s, N(CH<sub>2</sub>)<sub>2</sub>), 4.05 (4H, br s, N(CH<sub>2</sub>)<sub>2</sub>), 8.76 (1H, s, CH), 8.88 (1H, s, CH) ppm.

*2-[4-(Ethylsulfonyl)piperazin-1-yl]-8-nitro-6-(trifluoromethyl)-4H-1,3-benzothiazin-4-one* **3b** (11626092) Yield 74%. Mp. 204-7 °C (EtOH). Mass (EI),  $m/z$  ( $I_{relat.}(\%)$ ): 451.4208 [M]<sup>+</sup> (86). C<sub>15</sub>H<sub>15</sub>F<sub>3</sub>N<sub>4</sub>O<sub>5</sub>S<sub>2</sub>. <sup>1</sup>H NMR (DMSO-d<sub>6</sub>): 1.34 (3H, t,  $J = 7.4$  Hz, CH<sub>3</sub>), 2.75 (2H, q,  $J = 7.4$  Hz, CH<sub>2</sub>), 3.26 (4H, br s, N(CH<sub>2</sub>)<sub>2</sub>), 4.06 (4H, br s, N(CH<sub>2</sub>)<sub>2</sub>), 8.77 (1H, s, CH), 8.85 (1H, s, CH) ppm.

*2-[4-(Cyclopropylsulfonyl)piperazin-1-yl]-8-nitro-6-(trifluoromethyl)-4H-1,3-benzothiazin-4-one* **3c** (11626091) Yield 57%. Mp. 201-4 °C (EtOH). Mass (EI),  $m/z$  ( $I_{relat.}(\%)$ ): 463.4415 [M]<sup>+</sup> (52). C<sub>16</sub>H<sub>15</sub>F<sub>3</sub>N<sub>4</sub>O<sub>5</sub>S<sub>2</sub>. <sup>1</sup>H NMR (DMSO-d<sub>6</sub>): 1.48 (4H, m, CH<sub>2</sub>CH<sub>2</sub>), 3.26 (4H, br s, N(CH<sub>2</sub>)<sub>2</sub>), 3.81 (1H, m, CH), 4.09 (4H, br s, N(CH<sub>2</sub>)<sub>2</sub>), 8.73 (1H, s, CH), 8.86 (1H, s, CH) ppm.

*2-[4-(n-butylsulfonyl)piperazin-1-yl]-8-nitro-6-(trifluoromethyl)-4H-1,3-benzothiazin-4-one* **3d** (11626093) Yield 64%. Mp. 215-9 °C (H<sub>2</sub>O/EtOH). Mass (EI),

$m/z$  ( $I_{relat.}(\%)$ ): 479.4839 [M]<sup>+</sup> (89). C<sub>17</sub>H<sub>19</sub>F<sub>3</sub>N<sub>4</sub>O<sub>5</sub>S<sub>2</sub>. <sup>1</sup>H NMR (DMSO-d<sub>6</sub>): 0.85 (3H, t,  $J = 7.2$  Hz, CH<sub>3</sub>), 1.23 (2H, m, CH<sub>2</sub>), 1.66 (2H, m, CH<sub>2</sub>), 2.64 (2H, t,  $J = 7.2$  Hz, CH<sub>2</sub>), 3.21 (4H, br s, N(CH<sub>2</sub>)<sub>2</sub>), 4.06 (4H, br s, N(CH<sub>2</sub>)<sub>2</sub>), 8.75 (1H, s, CH), 8.84 (1H, s, CH) ppm.

2-[4-(Cyclohexylsulfonyl)piperazin-1-yl]-8-nitro-6-(trifluoromethyl)-4H-1,3-benzothiazin-4-one **3e** (11326127) Yield 47%. Mp. 283-5 °C (EtOH). Mass (EI),  $m/z$  ( $I_{relat.}(\%)$ ): 463.4415 [M]<sup>+</sup> (72). C<sub>19</sub>H<sub>21</sub>F<sub>3</sub>N<sub>4</sub>O<sub>5</sub>S<sub>2</sub>. <sup>1</sup>H NMR (DMSO-d<sub>6</sub>): 1.52 (6H, m, (CH<sub>2</sub>)<sub>3</sub>), 2.42 (4H, m, 2CH<sub>2</sub>), 2.64 (2H, t,  $J = 7.2$  Hz, CH<sub>2</sub>), 3.21 (4H, br s, N(CH<sub>2</sub>)<sub>2</sub>), 4.06 (4H, br s, N(CH<sub>2</sub>)<sub>2</sub>), 8.75 (1H, s, CH), 8.84 (1H, s, CH) ppm.

2-{4-[(4-butylphenyl)sulfonyl]piperazin-1-yl}-8-nitro-6-(trifluoromethyl)-4H-1,3-benzothiazin-4-one **3f** (11326124) Yield 37%. Mp. 226-9 °C (EtOH). Mass (EI),  $m/z$  ( $I_{relat.}(\%)$ ): 555.5799 [M]<sup>+</sup> (69). C<sub>23</sub>H<sub>23</sub>F<sub>3</sub>N<sub>4</sub>O<sub>5</sub>S<sub>2</sub>. <sup>1</sup>H NMR (DMSO-d<sub>6</sub>): 0.88 (3H, t,  $J = 7.2$  Hz, CH<sub>3</sub>), 1.23 (2H, m, CH<sub>2</sub>), 1.66 (2H, m, CH<sub>2</sub>), 2.66 (2H, m, CH<sub>2</sub>), 3.21 (4H, br s, N(CH<sub>2</sub>)<sub>2</sub>), 4.06 (4H, br s, N(CH<sub>2</sub>)<sub>2</sub>), 7.03 (2H, d,  $J = 8.7$  Hz, 2CH), 7.66 (2H, d,  $J = 8.7$  Hz, 2CH), 8.77 (1H, s, CH), 8.86 (1H, s, CH) ppm.

2-{4-[(4-trifluoromethylphenyl)sulfonyl]piperazin-1-yl}-8-nitro-6-(trifluoromethyl)-4H-1,3-benzothiazin-4-one **3g** (11326123) Yield 46%. Mp. 222-5 °C (EtOH). Mass (EI),  $m/z$  ( $I_{relat.}(\%)$ ): 567.4715 [M]<sup>+</sup> (50). C<sub>20</sub>H<sub>14</sub>F<sub>6</sub>N<sub>4</sub>O<sub>5</sub>S<sub>2</sub>. <sup>1</sup>H NMR (DMSO-d<sub>6</sub>): 3.22 (4H, br s, N(CH<sub>2</sub>)<sub>2</sub>), 4.05 (4H, br s, N(CH<sub>2</sub>)<sub>2</sub>), 7.82 (2H, d,  $J = 6.3$  Hz, 2CH), 8.04 (2H, d,  $J = 6.3$  Hz, 2CH), 8.72 (1H, s, CH), 8.88 (1H, s, CH) ppm.

2-{4-[(4-trifluoromethoxyphenyl)sulfonyl]piperazin-1-yl}-8-nitro-6-(trifluoromethyl)-4H-1,3-benzothiazin-4-one **3h** (11326120) Yield 52%. Mp. 207-9 °C (EtOH). Mass (EI),  $m/z$  ( $I_{relat.}(\%)$ ): 583.4709 [M]<sup>+</sup> (36). C<sub>20</sub>H<sub>14</sub>F<sub>6</sub>N<sub>4</sub>O<sub>7</sub>S<sub>2</sub>. <sup>1</sup>H NMR (DMSO-d<sub>6</sub>): 3.20 (4H, br s, N(CH<sub>2</sub>)<sub>2</sub>), 4.01 (4H, br s, N(CH<sub>2</sub>)<sub>2</sub>), 7.62 (2H, d,  $J = 6.3$  Hz, 2CH), 7.90 (2H, d,  $J = 6.3$  Hz, 2CH), 8.71 (1H, s, CH), 8.83 (1H, s, CH) ppm.

2-{4-[(4-acetylphenyl)sulfonyl]piperazin-1-yl}-8-nitro-6-(trifluoromethyl)-4H-1,3-benzothiazin-4-one **3i** (11326119) Yield 64%. Mp. 280-2 °C (CH<sub>3</sub>CN). Mass (EI),  $m/z$  ( $I_{relat.}(\%)$ ): 541.5102 [M]<sup>+</sup> (59). C<sub>21</sub>H<sub>17</sub>F<sub>3</sub>N<sub>4</sub>O<sub>6</sub>S<sub>2</sub>. <sup>1</sup>H NMR (DMSO-d<sub>6</sub>): 2.48 (3H, s, CH<sub>3</sub>), 3.26 (4H, br s, N(CH<sub>2</sub>)<sub>2</sub>), 4.03 (4H, br s, N(CH<sub>2</sub>)<sub>2</sub>), 7.97 (4H, m, 4CH), 8.71 (1H, s, CH), 8.83 (1H, s, CH) ppm.

2-(4-{4-(1,1-dimethylpropyl)phenyl}sulfonyl}piperazin-1-yl)-8-nitro-6-(trifluoromethyl)-4H-1,3-benzothiazin-4-one **3j** (11326125) Yield 37%. Mp. 231-3 °C (EtOH). Mass (EI),  $m/z$  ( $I_{relat.}(\%)$ ): 569.6065 [M]<sup>+</sup> (33). C<sub>24</sub>H<sub>25</sub>F<sub>3</sub>N<sub>4</sub>O<sub>6</sub>S<sub>2</sub>. <sup>1</sup>H NMR

(DMSO-d<sub>6</sub>): 0.76 (3H, t,  $J = 7.2$  Hz, CH<sub>3</sub>), 1.31 (6H, s, 2CH<sub>3</sub>), 1.69 (2H, m, CH<sub>2</sub>), 3.23 (4H, br s, N(CH<sub>2</sub>)<sub>2</sub>), 4.06 (4H, br s, N(CH<sub>2</sub>)<sub>2</sub>), 7.33 (2H, d,  $J = 8.7$  Hz, 2CH), 7.47 (2H, d,  $J = 8.7$  Hz, 2CH), 8.73 (1H, s, CH), 8.87 (1H, s, CH) ppm.

2-{4-[(3,5-dimethylisoxazol-4-yl)sulfonyl]piperazin-1-yl}-8-nitro-6-(trifluoromethyl)-4H-1,3-benzothiazin-4-one **3k** (11326056) Yield 79%. Mp. 265-7 °C (EtOH/DMF). Mass (EI),  $m/z$  ( $I_{relat.}(\%)$ ): 518.4813 [M]<sup>+</sup> (31). C<sub>18</sub>H<sub>16</sub>F<sub>3</sub>N<sub>5</sub>O<sub>6</sub>S<sub>2</sub>. <sup>1</sup>H NMR (DMSO-d<sub>6</sub>): 2.31 (3H, s, CH<sub>3</sub>), 2.64 (3H, s, CH<sub>3</sub>), 3.26 (4H, br s, N(CH<sub>2</sub>)<sub>2</sub>), 4.05 (4H, br s, N(CH<sub>2</sub>)<sub>2</sub>), 8.77 (1H, s, CH), 8.85 (1H, s, CH) ppm.

2-{4-[(1-ethyl-3-methyl-1H-pyrazol-4-yl)sulfonyl]piperazin-1-yl}-8-nitro-6-(trifluoromethyl)-4H-1,3-benzothiazin-4-one **3l** (11326058) Yield 73%. Mp. 218-20 °C (EtOH). Mass (EI),  $m/z$  ( $I_{relat.}(\%)$ ): 531.5237 [M]<sup>+</sup> (44). C<sub>19</sub>H<sub>19</sub>F<sub>3</sub>N<sub>6</sub>O<sub>5</sub>S<sub>2</sub>. <sup>1</sup>H NMR (DMSO-d<sub>6</sub>): 1.31 (3H, t,  $J = 5.9$  Hz, CH<sub>3</sub>), 2.28 (3H, s, CH<sub>3</sub>), 3.18 (4H, br s, N(CH<sub>2</sub>)<sub>2</sub>), 4.06 (4H, br s, N(CH<sub>2</sub>)<sub>2</sub>), 4.09 (2H, q,  $J = 6.6$  Hz, CH<sub>3</sub>), 8.27 (1H, s, CH), 8.78 (1H, s, CH), 8.86 (1H, s, CH) ppm.

8-nitro-2-[4-(2-thienylsulfonyl)piperazin-1-yl]-6-(trifluoromethyl)-4H-1,3-benzothiazin-4-one **3m** (11326059) Yield 80%. Mp. 210-4 °C (EtOH). Mass (EI),  $m/z$  ( $I_{relat.}(\%)$ ): 505.5042 [M]<sup>+</sup> (67). C<sub>17</sub>H<sub>13</sub>F<sub>3</sub>N<sub>4</sub>O<sub>5</sub>S<sub>3</sub>. <sup>1</sup>H NMR (DMSO-d<sub>6</sub>): 3.20 (4H, br s, N(CH<sub>2</sub>)<sub>2</sub>), 4.05 (4H, br s, N(CH<sub>2</sub>)<sub>2</sub>), 7.25 (1H, br s, CH), 7.68 (1H, br s, CH), 8.03 (1H, br s, CH), 8.73 (1H, s, CH), 8.83 (1H, s, CH) ppm.

2-{4-[(1,3-dimethyl-1H-pyrazol-4-yl)sulfonyl]piperazin-1-yl}-8-nitro-6-(trifluoromethyl)-4H-1,3-benzothiazin-4-one **3n** (11326061) Yield 64%. Mp. 200-3 °C (EtOH). Mass (EI),  $m/z$  ( $I_{relat.}(\%)$ ): 517.4966 [M]<sup>+</sup> (74). C<sub>18</sub>H<sub>17</sub>F<sub>3</sub>N<sub>6</sub>O<sub>5</sub>S<sub>2</sub>. <sup>1</sup>H NMR (DMSO-d<sub>6</sub>): 2.41 (3H, s, CH<sub>3</sub>), 3.17 (4H, br s, N(CH<sub>2</sub>)<sub>2</sub>), 3.72 (3H, s, NCH<sub>3</sub>), 4.03 (4H, br s, N(CH<sub>2</sub>)<sub>2</sub>), 7.63 (s, 1H, CH), 8.75 (1H, s, CH), 8.86 (1H, s, CH) ppm.

2-{4-[(5-chloro-2-thienyl)sulfonyl]piperazin-1-yl}-8-nitro-6-(trifluoromethyl)-4H-1,3-benzothiazin-4-one **3o** (11326121) Yield 39%. Mp. 210-3 °C (EtOH/DMF). Mass (EI),  $m/z$  ( $I_{relat.}(\%)$ ): 539.9492 [M]<sup>+</sup> (53). C<sub>17</sub>H<sub>12</sub>F<sub>3</sub>ClN<sub>4</sub>O<sub>5</sub>S<sub>3</sub>. <sup>1</sup>H NMR (DMSO-d<sub>6</sub>): 3.24 (4H, br s, N(CH<sub>2</sub>)<sub>2</sub>), 4.06 (4H, br s, N(CH<sub>2</sub>)<sub>2</sub>), 7.39 (1H, d,  $J = 5.1$  Hz, CH), 7.58 (1H, d,  $J = 5.1$  Hz, CH), 8.78 (1H, s, CH), 8.85 (1H, s, CH) ppm.

2-{4-[(4,5-dichloro-2-thienyl)sulfonyl]piperazin-1-yl}-8-nitro-6-(trifluoromethyl)-4H-1,3-benzothiazin-4-one **3p** (11326122) Yield 46%. Mp. 265-7 °C (EtOH/DMF). Mass (EI),  $m/z$  ( $I_{relat.}(\%)$ ): 574.3942 [M]<sup>+</sup> (58). C<sub>17</sub>H<sub>11</sub>F<sub>3</sub>Cl<sub>2</sub>N<sub>4</sub>O<sub>5</sub>S<sub>3</sub>. <sup>1</sup>H NMR (DMSO-

d<sub>6</sub>): 3.26 (4H, br s, N(CH<sub>2</sub>)<sub>2</sub>), 4.07 (4H, br s, N(CH<sub>2</sub>)<sub>2</sub>), 7.83 (1H, s, CH), 8.77 (1H, s, CH), 8.86 (1H, s, CH) ppm.

2-{4-[(3-methylisoxazol-4-yl)sulfonyl]piperazin-1-yl}-8-nitro-6-(trifluoromethyl)-4H-1,3-benzothiazin-4-one **3q** (11326126) Yield 86%. Mp. 281-3 °C (EtOH/DMF). Mass (EI), *m/z* (*I*<sub>relat.</sub>(%)): 504.4542 [M]<sup>+</sup> (61). C<sub>17</sub>H<sub>14</sub>F<sub>3</sub>N<sub>5</sub>O<sub>6</sub>S<sub>2</sub>. <sup>1</sup>H NMR (DMSO-d<sub>6</sub>): 2.33 (3H, s, CH<sub>3</sub>), 3.26 (4H, br s, N(CH<sub>2</sub>)<sub>2</sub>), 4.04 (4H, br s, N(CH<sub>2</sub>)<sub>2</sub>), 7.69 (1H, s, CH), 8.75 (1H, s, CH), 8.86 (1H, s, CH) ppm.

Methyl 3-({4-[8-nitro-4-oxo-6-(trifluoromethyl)-4H-1,3-benzothiazin-2-yl]piperazin-1-yl}sulfonyl)thiophene-2-carboxylate **3r** (11326128) Yield 74%. Mp. 127-9 °C (EtOH/DMF). Mass (EI), *m/z* (*I*<sub>relat.</sub>(%)): 563.5412 [M]<sup>+</sup> (68). C<sub>19</sub>H<sub>15</sub>F<sub>3</sub>N<sub>4</sub>O<sub>7</sub>S<sub>3</sub>. <sup>1</sup>H NMR (DMSO-d<sub>6</sub>): 3.20 (4H, br s, N(CH<sub>2</sub>)<sub>2</sub>), 3.83 (3H, s, OCH<sub>3</sub>), 4.07 (4H, br s, N(CH<sub>2</sub>)<sub>2</sub>), 6.81 (1H, d, *J* = 5.3 Hz, CH), 7.67 (1H, d, *J* = 5.3 Hz, CH), 8.70 (1H, s, CH), 8.84 (1H, s, CH) ppm.

2-[4-(isoquinolin-5-ylsulfonyl)piperazin-1-yl]-8-nitro-6-(trifluoromethyl)-4H-1,3-benzothiazin-4-one **3s** (11626094) Yield 85%. Mp. 243-5 °C (EtOH/DMF). Mass (EI), *m/z* (*I*<sub>relat.</sub>(%)): 550.5265 [M]<sup>+</sup> (36). C<sub>22</sub>H<sub>16</sub>F<sub>3</sub>N<sub>5</sub>O<sub>5</sub>S<sub>2</sub>. <sup>1</sup>H NMR (DMSO-d<sub>6</sub>): 3.24 (4H, br s, N(CH<sub>2</sub>)<sub>2</sub>), 4.06 (4H, br s, N(CH<sub>2</sub>)<sub>2</sub>), 7.80 (1H, t, *J* = 7.9 Hz, CH), 7.99 (1H, d, *J* = 5.6 Hz, CH), 8.38 (2H, m, 2CH), 8.73 (1H, s, CH), 8.85 (1H, s, CH), 8.93 (1H, d, *J* = 5.6 Hz, CH), 9.57 (1H, s, CH) ppm.

**Table S1** : IC<sub>50</sub> values measured for Ty38c, PBTZ169 and sPBTZ169 (11326127) against wild-type and BTZ-resistant *M. tuberculosis* C387S DprE1

| compound | structure                                                                         | IC <sub>50</sub> (μM) |       | References |
|----------|-----------------------------------------------------------------------------------|-----------------------|-------|------------|
|          |                                                                                   | WT                    | C387S |            |
| PBTZ169  | 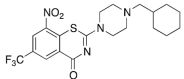 | 0.3                   | 3.6   | This study |
| Ty38c    |  | 0.2                   | 0.2   | (1)        |
| sPBTZ169 |  | 1.1                   | 12    | This study |

**Table S2.** Data collection and refinement statistics

|                              | DprE1-sPBTZ169                        |
|------------------------------|---------------------------------------|
| Beamline                     | SLS X06DA (PXIII)                     |
| Wavelength (Å)               | 1                                     |
| Resolution range (Å)         | 49.15- 2.40 (2.48-2.40)               |
| Space group                  | P 1 2 <sub>1</sub> 1                  |
| Unit cell (Å, °)             | 78.164 84.024 81.666<br>90 103.983 90 |
| Total reflections            | 79124 (7781)                          |
| Unique reflections           | 39831 (3914)                          |
| Multiplicity                 | 2.0 (2.0)                             |
| Completeness (%)             | 98.81 (98.19)                         |
| Mean I/sigma(I)              | 16.42 (2.56)                          |
| R-merge                      | 0.03362 (0.3709)                      |
| R-meas                       | 0.04754 (0.5245)                      |
| CC1/2                        | 0.999 (0.85)                          |
| CC*                          | 1 (0.959)                             |
| R-work                       | 0.1978                                |
| R-free                       | 0.2248                                |
| Number of non-hydrogen atoms | 6512                                  |
| Ramachandran favored (%)     | 97.58                                 |
| Ramachandran allowed (%)     | 2.42                                  |
| Ramachandran outliers (%)    | 0.00                                  |
| Rotamer outliers (%)         | 1.92                                  |
| Clashscore                   | 4.47                                  |
| Average B-factor             | 60.34                                 |

Statistics for the highest-resolution shell are shown in parentheses.



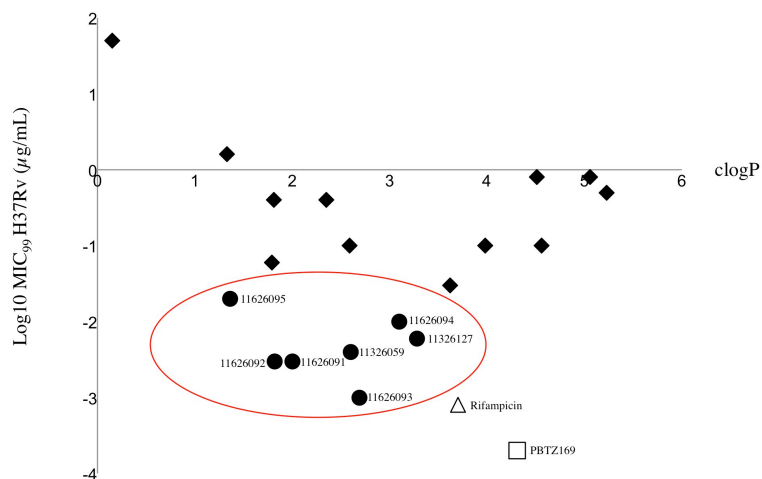

**Fig S1: Antitubercular activity versus hydrophobicity.** Distribution and activity of 2-sulphonylpiperazin 8-nitro 6-trifluoromethyl 1,3-benzothiazin-4-ones derivatives as a function of clogP. Surrounded in red, the 7 chosen compounds with a good activity/logP profile. Lozenges indicate other compounds not discussed in the text.

## References

1. Foo CS, Lechartier B, Kolly GS, Boy-Rottger S, Neres J, Rybniker J, Lupien A, Sala C, Piton J, Cole ST. 2016. Characterization of DprE1-Mediated Benzothiazinone Resistance in *Mycobacterium tuberculosis*. *Antimicrob Agents Chemother* 60:6451-6459.
